# Supplementary material for: Increased spatial coupling of integrin and collagen IV in the immunoresistant clear cell renal cell carcinoma tumor microenvironment
Source: PubMed Central journal article supplement (PMC10680839; doi:10.1101/2023.11.16.567457), 2023-11-17

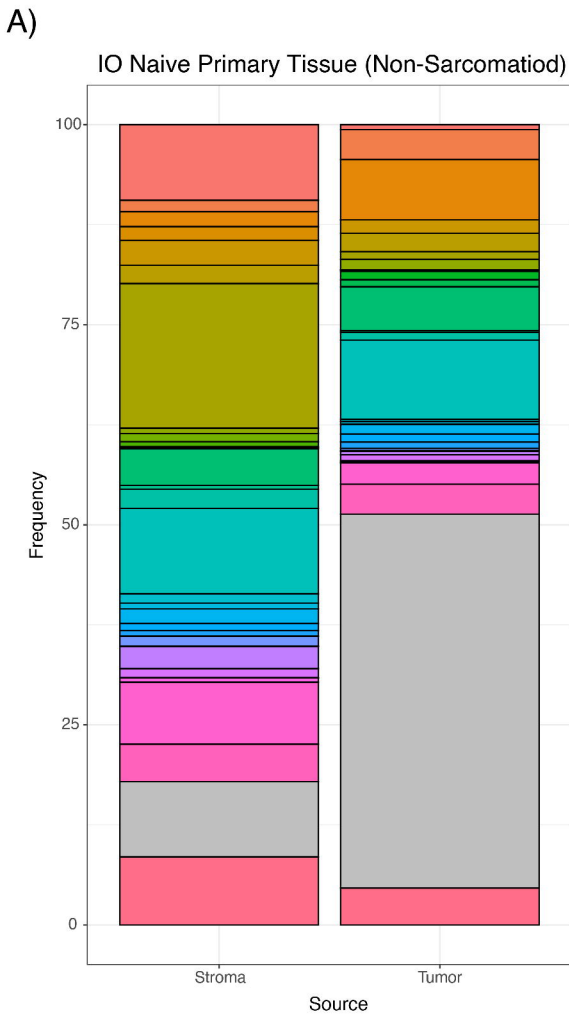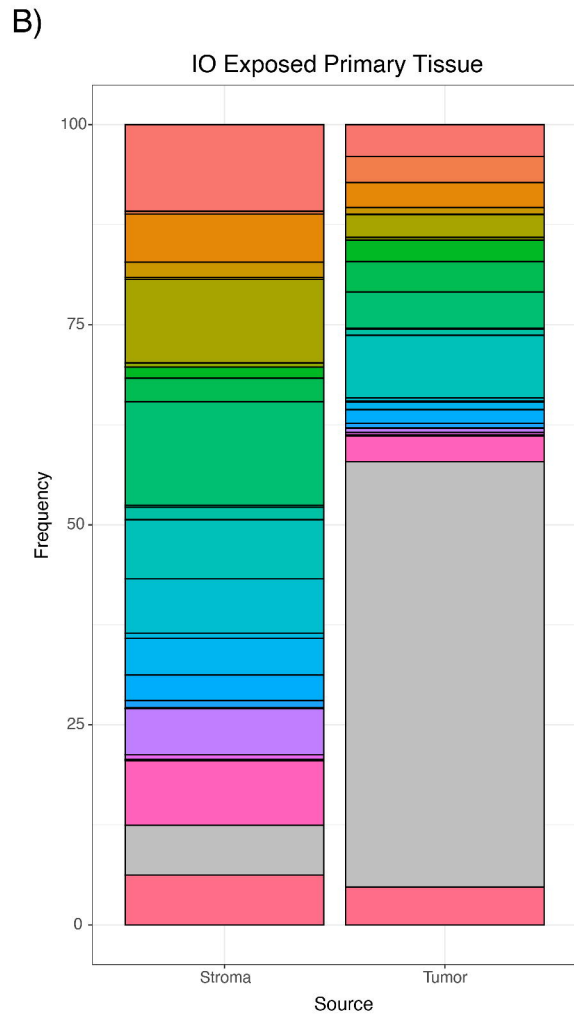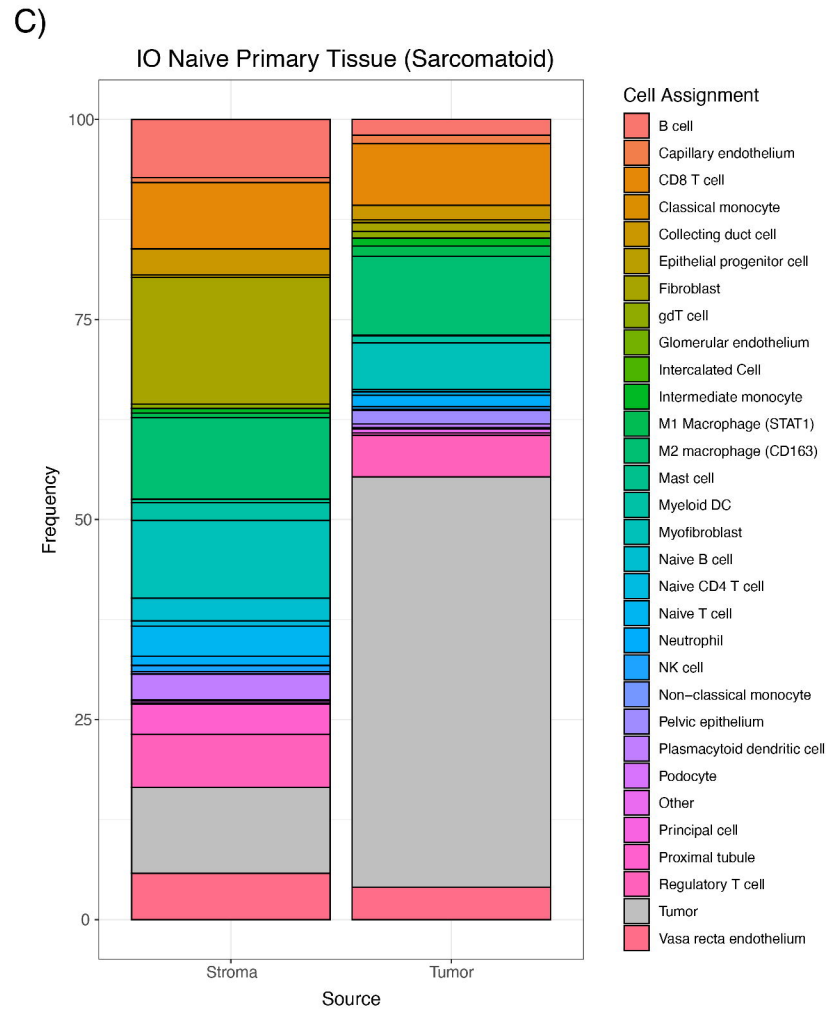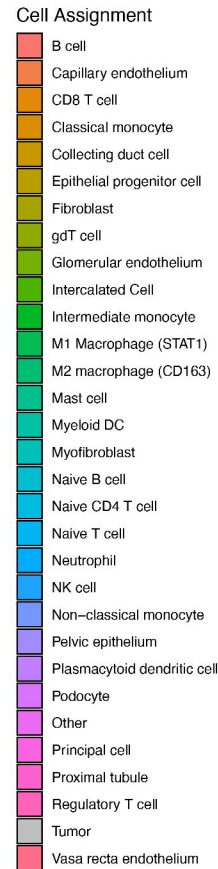

SCT Expression

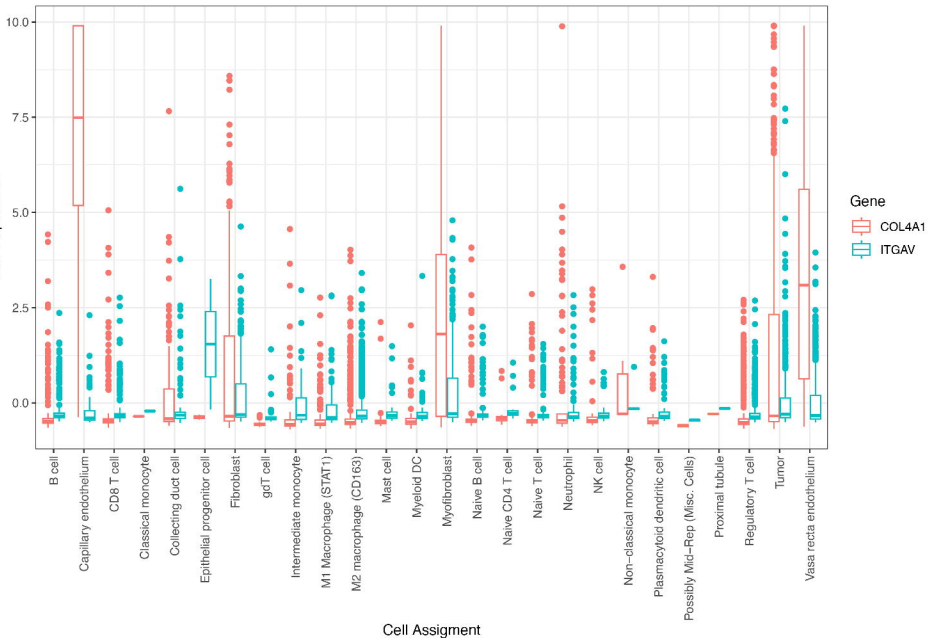

A)

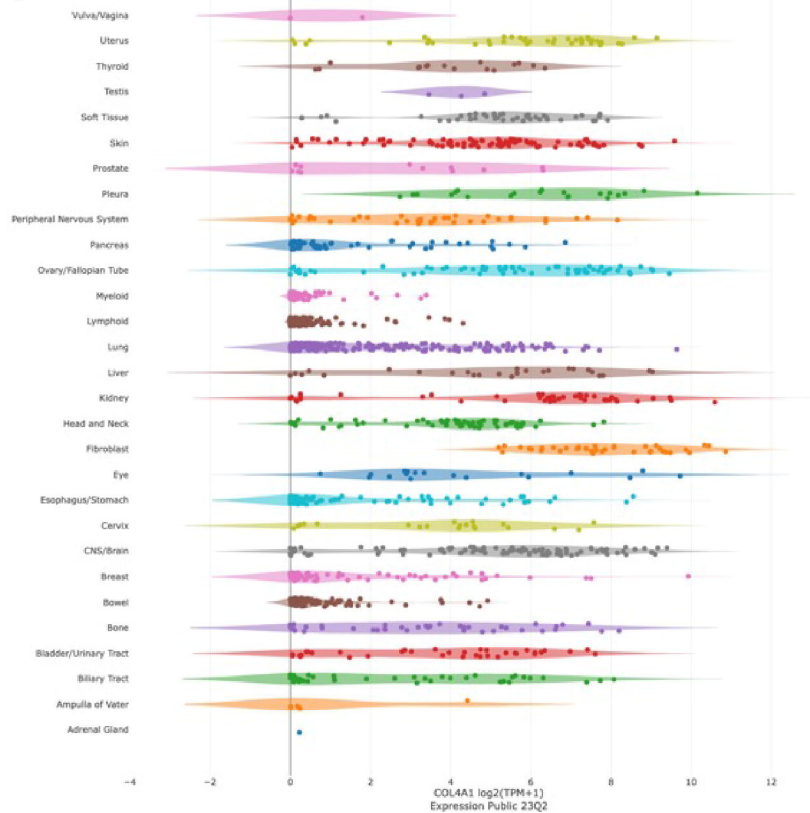

B)

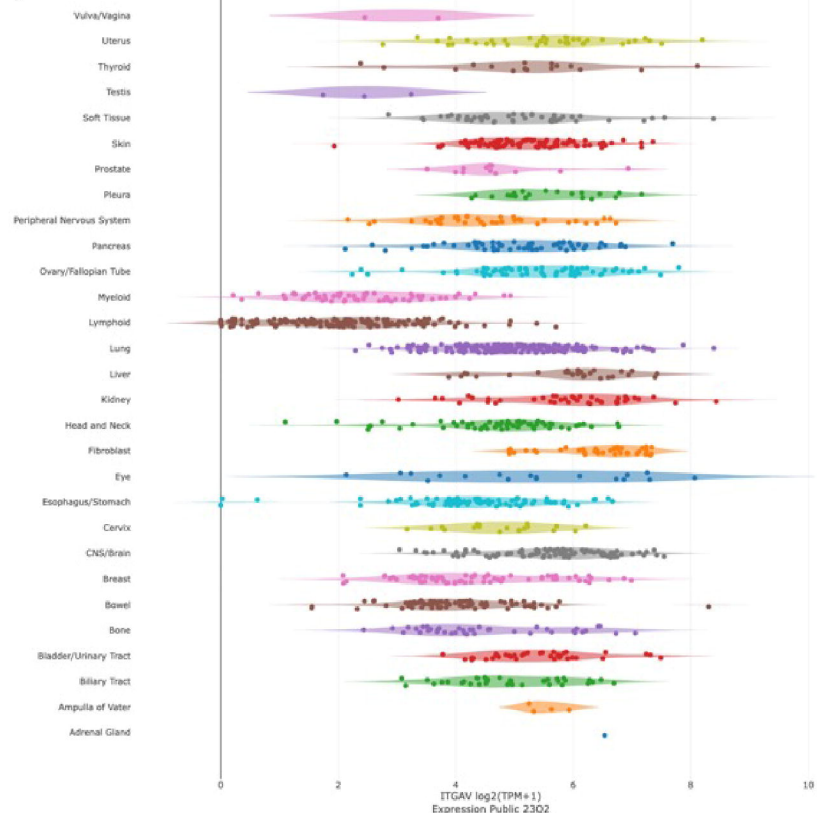

Supplement: NIHPP2023.11.16.567457v1-supplement-5.pdf [file NIHPP2023.11.16.567457v1-supplement-5.pdf]
